# Supplementary material
Source: PubMed Central journal article supplement (PMC3790511)
Supplement: supp_blood-2012-12-472183_blood-2012-12-472183-1.pdf [file supp_blood-2012-12-472183_blood-2012-12-472183-1.pdf]

**Table S1. Primer Sequences**

|                                           | <b>Primer sequence</b>                                                                                                                 |
|-------------------------------------------|----------------------------------------------------------------------------------------------------------------------------------------|
| <b>h C/EBP<math>\alpha</math> forward</b> | 5'-TGG ACA AGA ACA GCA ACG AG-3'                                                                                                       |
| <b>h C/EBP<math>\alpha</math> reverse</b> | 5'-TTG TCA CTG GTC AGC TCC AG-3'                                                                                                       |
| <b>m C/EBP<math>\alpha</math> forward</b> | 5'-GAC CAT TAG CCT TGT GTG TAC TGT ATG-3'                                                                                              |
| <b>m C/EBP<math>\alpha</math> reverse</b> | 5'-TGG ATC GAT TGT GCT TCA AGT T-3'                                                                                                    |
| <b>GCSF-R forward</b>                     | 5'-ACC TGG GCA CAG CTG GAG TGG-3'                                                                                                      |
| <b>GCSF-R reverse</b>                     | 5'-CAG GCT GCT GTG AGC TGG GTC TGG-3'                                                                                                  |
| <b>Notch1 forward</b>                     | 5'-CAA CAT CCA GGA CAA CAT GG-3'                                                                                                       |
| <b>Notch1 reverse</b>                     | 5'-GGA CTT GCC CAG GTC ATC TA-3'                                                                                                       |
| <b>GAPDH forward</b>                      | 5'-ACC ACA GTC CAT GCC ATC AC-3'                                                                                                       |
| <b>GAPDH reverse</b>                      | 5'-TCC ACC ACC CTG TTG CTG TA-3'                                                                                                       |
| <b>mature miR-30c forward</b>             | 5'-TGC TGT GTA AAC ATC CTA CAC TCT CAG CGT TTT GGC CAC<br>TGA CTG ACG CTG AGA GTA GGA TGT TTA CA-3'                                    |
| <b>mature miR-30c reverse</b>             | 5'-CCT GTG TAA ACA TCC TAC TCT CAG CGT CAG TCA GTG GCC<br>AAA ACG CTG AGA GTG TAG GAT GTT TAC AC-3'                                    |
| <b>Notch1 3'UTR mut forward</b>           | 5'-CAT GAC CAG ATG CGT CCC AAG ATG TTG ATT TTT ACT GTG<br>TTT TAT AAA ATA CTG TCA AGT AAT CAG AAA AAG ACT TTA AAA<br>GTG ATC TAC AT-3' |
| <b>Notch1 3'UTR mut reverse</b>           | 5'-ATG TAG ATC ACT TTT AAA GTC TTT TTC TGA TTA CTT GAC<br>AGT ATT TTA TAA AAC ACA GTA AAA ATC AAC ATC TTG GGA CGC<br>ATC TGG TCA TG-3' |
| <b>Primer #1 forward</b>                  | 5'-ACA TCT GTC TCT ACA ATC TCA ACA-3'                                                                                                  |
| <b>Primer #1 reverse</b>                  | 5'-CAG GCA CTC TAT TTG ATG AAT GAA T-3'                                                                                                |
| <b>Primer #2 forward</b>                  | 5'-CGA CCT TCA TCC CCC AGT TC-3'                                                                                                       |
| <b>Primer #2 reverse</b>                  | 5'-CAC CCT GCC TAT CCT TGT GG-3'                                                                                                       |
| <b>Primer #3 forward</b>                  | 5'-CAA GCC CTG TAG TTG GGG AG-3'                                                                                                       |
| <b>Primer #3 reverse</b>                  | 5'-AGC TTT AGT GGG GCA GAA GTC-3'                                                                                                      |
| <b>Primer #4 forward</b>                  | 5'-ACT CCA TTC ATG TGT ATG CCT CT-3'                                                                                                   |
| <b>Primer #4 reverse</b>                  | 5'-ATG CAG CTT CTC ACT CTC TGG-3'                                                                                                      |

h – human; m – mouse; mut – mutant; 3'UTR – 3' untranslated region

**Table S2. Genetic and morphological characteristics of AML patients used for miRNA-30c analysis.**

| Patient No. | Morphology by FAB | karyotype | FLT3 mutation status | % blast cells | age | gender  |
|-------------|-------------------|-----------|----------------------|---------------|-----|---------|
|             | healthy           | -         | -                    | -             | -   | unknown |
|             | healthy           | -         | -                    | -             | -   | unknown |
|             | healthy           | -         | -                    | -             | -   | unknown |
| 1           | M4/5              | normal    | unknown              | unknown       | 75  | m       |
| 2           | M1                | normal    | unknown              | unknown       | 72  | m       |
| 3           | unclassified      | normal    | negative             | unknown       | 21  | m       |
| 4           | unclassified      | normal    | TKD                  | unknown       | 39  | f       |
| 5           | unclassified      | normal    | negative             | unknown       | 43  | f       |
| 6           | unclassified      | normal    | TKD                  | unknown       | 58  | m       |
| 7           | unclassified      | normal    | ITD                  | unknown       | 70  | f       |
| 8           | M5                | complex   | negative             | 90            | 65  | f       |
| 9           | M5                | complex   | unknown              | unknown       | 73  | m       |
| 10          | M5                | complex   | unknown              | 90            | 56  | m       |
| 11          | M1                | complex   | unknown              | unknown       | 60  | m       |
| 12          | unclassified      | complex   | ITD/ TKD             | unknown       | 29  | m       |
| 13          | unclassified      | complex   | ITD                  | unknown       | 30  | f       |
| 14          | M3                | t(15;17)  | unknown              | unknown       | 32  | f       |
| 15          | M3                | t(15;17)  | TKD                  | unknown       | 23  | f       |
| 16          | M3                | t(15;17)  | negative             | unknown       | 50  | m       |
| 17          | M3                | t(15;17)  | negative             | unknown       | 70  | m       |
| 18          | unclassified      | t(8;21)   | ITD                  | unknown       | 42  | m       |
| 19          | unclassified      | t(8;21)   | ITD/ TKD             | unknown       | 67  | m       |
| 20          | M2                | t(8;21)   | unknown              | unknown       | 40  | m       |
| 21          | M2                | t(8;21)   | unknown              | 23            | 43  | f       |
| 22          | unclassified      | t(8;21)   | negative             | unknown       | 53  | f       |
| 23          | unclassified      | t(8;21)   | negative             | unknown       | 42  | m       |
| 24          | unclassified      | Inv(16)   | negative             | unknown       | 60  | m       |
| 25          | unclassified      | Inv(16)   | TKD                  | unknown       | 40  | m       |
| 26          | unclassified      | Inv(16)   | TKD                  | unknown       | 39  | m       |
| 27          | unclassified      | Inv(16)   | TKD                  | unknown       | 42  | m       |
| 28          | unclassified      | Inv(16)   | TKD                  | unknown       | 29  | m       |
| 29          | unclassified      | Inv(16)   | negative             | unknown       | 41  | f       |
| 30          | unclassified      | Inv(16)   | negative             | unknown       | 45  | f       |

FAB indicates French-American-British; TKD - Tyrosinkinasedomaine; ITD - Internal Tandem Duplication; m - male; f – female

**Table S3. Genetic and morphological characteristics of normal karyotype AML patients with *CEBPA* mutations and *CEBPA* wildtyp used for miRNA-30c analysis.**

| Patient No. | Morphology by FAB | Karyotype | <i>CEBPA</i> mutation status | % blast cells | <i>FLT3</i> mutation status | age | gender |
|-------------|-------------------|-----------|------------------------------|---------------|-----------------------------|-----|--------|
| 1           | s-AML             | normal    | WT                           | 46            | negative                    | 78  | f      |
| 2           | M4                | normal    | WT                           | unknown       | negative                    | 74  | m      |
| 3           | M5a               | normal    | WT                           | 99            | negative                    | 82  | m      |
| 4           | M0                | normal    | WT                           | 90            | negative                    | 63  | f      |
| 5           | unclassified      | normal    | monoallelic                  | unknown       | negative                    | 65  | m      |
| 6           | unclassified      | normal    | monoallelic                  | unknown       | negative                    | 50  | m      |
| 7           | unclassified      | normal    | monoallelic                  | unknown       | negative                    | 73  | f      |
| 8           | unclassified      | normal    | monoallelic                  | unknown       | ITD                         | 60  | f      |
| 9           | M2                | normal    | biallelic                    | 66            | negative                    | 68  | f      |
| 10          | M2                | normal    | biallelic                    | 22            | negative                    | 66  | f      |
| 11          | unclassified      | normal    | biallelic                    | unknown       | negative                    | 66  | f      |
| 12          | M1                | normal    | biallelic                    | 58,5          | negative                    | 82  | m      |

FAB indicates French-American-British; s-AML – secondary AML; WT - wildtype; m - male; f – female; ITD – Internal Tandem Duplication
